# Supplementary material for: A Survey of Gopherus polyphemus Intestinal Parasites in South Florida
Source: J Parasitol Res. 2018 Dec 26;2018:3048795. doi: 10.1155/2018/3048795 (PMC6327265; doi:10.1155/2018/3048795)
Supplement: Supplementary Materials — The supplementary file contains parasite identification and load estimation results obtained by National Bio Vet Laboratories, including the corresponding accession numbers. [file 3048795.f1.xlsx]

## Sheet: Data
Accesion #	Tortoise/ID #	Site	Age Class	Sex	Pinworm	Tachygonetria	Augusticaecum	Telorchis	Eimeria	Cryptosporidium	Amoebas
16020962	1	BSP	Juvenile		+	-	+	-	-	-	-	-	0/HPF
16020960	2	BSP	Adult	Female	+++	-	-	+	-	-	-	+	<1-1/LPF
16020961	3 (C)	BSP	Adult	Female	+	-	-	-	+	-	-	++	2-4/LPF
16020991	3 (C, resample)	BSP	Adult	Female	+++	+	+	-	-	-	-	+++	>=5/LPF
16020964	4	BSP	Adult	Female	+	-	-	+	-	-	-
16020965	5	BSP	Adult	Female	++	-	+	-	-	-	-
16020970	6	BSP	Adult	Female	-	+	-	-	-	-	-
16020972	7	BSP	Adult	Female	-	-	-	-	-	-	-
16020973	8	BSP	Adult	Female	+	+	-	-	-	-	-
16020974	9	BSP	Adult	Female	+	+	-	+	+	-	-
16020976	10	BSP	Adult	Female	-	+	-	+	-	-	-
16020992	11	BSP	Adult	Female	-	-	-	-	-	-	-
16089766	12	BSP	Adult	Female	-	-	-	-	-	-	-
16089767	13	BSP	Adult	Female	+	-	-	-	-	-	-
16020966	14	BSP	Adult	Male	+	+	-	-	-	-	-
16020967	15	BSP	Adult	Male	+++	-	-	-	+	-	-
16020968	16	BSP	Adult	Male	++	-	-	+	-	-	-
16020969	17	BSP	Adult	Male	-	-	-	-	-	-	-
16020971	18	BSP	Adult	Male	-	-	-	+	-	-	-
16020959	19	BSP	Adult		++	-	-	-	+	-	-
16020957	20	BSP	Sub Adult		+	-	-	-	-	-	-
16020975	21	BSP	Sub Adult		++	-	-	-	-	-	-
16089764	22	BSP	Sub Adult		+	+	-	-	-	-	-
16089765	23	BSP	Sub Adult		+	-	-	-	+	-	-
16020963	24	BSP			++	-	+	-	-	-	-
16020977	25	BSP			++	+	-	-	-	-	-
16020907	26	FAU	Adult	Female	-	-	-	-	-	-	-
16020909	27 (B)	FAU	Adult	Female	-	+	-	-	-	-	-
16089760	27 (B, resample)	FAU	Adult	Female	-	-	-	-	-	-	-
16020910	28	FAU	Adult	Female	+	+	-	-	-	-	-
16020913	29	FAU	Adult	Female	++	+	-	-	-	-	-
16020915	30	FAU	Adult	Female	++	+	-	-	-	-	-
16089757	31	FAU	Adult	Female	++ (larvae)	-	-	-	-	-	-
16089758	32	FAU	Adult	Female	+++	++	-	-	-	-	-
16089759	33	FAU	Adult	Female	++	-	-	-	-	-	-
16089762	34	FAU	Adult	Female	-	-	-	-	-	-	-
16020919	35	FAU	Adult	Female	+	+	-	-	-	-	-
16020911	36	FAU	Adult	Male	+	-	-	-	-	-	-
16020914	37	FAU	Adult	Male	++	++	-	-	-	-	-
16020916	38 (A)	FAU	Adult	Male	++	+	-	-	-	-	-
16089756	38 (A, resample)	FAU	Adult	Male	+	-	-	-	-	-	-
16020917	39	FAU	Adult	Male	++	+	-	-	-	-	-
16020920	40	FAU	Adult	Male	+++	+	-	-	-	-	+
16089761	41	FAU	Adult	Male	-	-	-	-	-	-	-
16089763	42	FAU	Adult	Male	++	+	-	-	-	-	-
16020918	43	FAU	Adult		+	+	-	-	+	-	-
16020908	44	FAU			-	+	-	-	+	-	-
16020912	45	FAU			+	+	-	-	-	-	-
16020942	46	PJP	Adult	Female	++	-	-	-	-	-	-
16020946	47	PJP	Adult	Female	-	-	-	-	-	-	-
16020948	48	PJP	Adult	Female	++	+	-	-	-	-	-
16020949	49	PJP	Adult	Female	++	+	-	-	+	-	-
16020950	50	PJP	Adult	Female	-	+	-	+	+	-	-
16020951	51	PJP	Adult	Female	+	-	-	-	-	-	-
16020952	52	PJP	Adult	Female	++	-	-	-	-	+	-
16020954	53	PJP	Adult	Female	+	++	-	-	-	-	-
16089818	54	PJP	Adult	Female	+	+	-	-	-	-	-
16089819	55	PJP	Adult	Female	-	-	-	-	-	-	-
16089820	56	PJP	Adult	Female	+	-	-	-	+	-	-
16020943	57	PJP	Adult	Male	++	+	-	-	-	-	-
16020947	58	PJP	Adult	Male	++	+	+	-	-	-	-
16020953	59	PJP	Adult	Male	+++	++	-	-	-	-	-
16020955	60	PJP	Adult	Male	+++	+	-	-	-	-	-
16089817	61	PJP	Adult	Male	-	-	-	-	+	-	-
16020945	62	PJP	Adult		+	-	-	-	-	-	-
16020956	63	PJP	Juvenile		+	+	+	-	+	-	-
16020941	64	PJP			+	+	-	-	-	-	-
16020944	65	PJP			++	+	-	-	-	-	-
16020992	66	PJP			++	-	-	+	-	-	-
16089807	67	JDSPP	Adult	Female	+++	-	-	-	-	-	-
16089808	68	JDSPP	Adult	Female	++	+	-	-	-	-	-
16089810	69	JDSPP	Adult	Female	+	-	+	-	-	-	-
16089816	70	JDSPP	Adult	Female	++	-	-	-	-	-	-
17028974	71	JDSPP	Adult	Female	++	-	-	-	-	-	-
17028973	72	JDSPP	Adult	Female	+	-	-	-	-	-	-
17028972	73	JDSPP	Adult	Female	++	-	-	-	-	-	-
16089811	74	JDSPP	Adult	Male	+++	-	-	-	-	-	-
16089812	75	JDSPP	Adult	Male	-	+	-	-	-	-	-
16089813	76	JDSPP	Adult	Male	+++	-	-	-	-	-	-
17028971	77	JDSPP	Adult	Male	+	-	-	-	-	-	-
16089814	78	JDSPP	Sub Adult		++	-	-	-	-	-	-
16020925	79	JDSPP	Adult		+++	++	-	-	-	-	-
16089809	80	JDSPP	Sub Adult		+	-	-	-	-	-	-
16089815	81	JDSPP			+	-	-	-	-	-	-
16089796	82	JDSPS	Adult	Female	-	++	-	-	-	-	-
16089797	83	JDSPS	Adult	Female	+	+	-	-	-	-	-
16089799	84	JDSPS	Adult	Female	+	+	-	-	-	-	-
16089802	85	JDSPS	Adult	Female	+	+	-	-	-	-	-
16020923	86	JDSPS	Adult	Female	++	+	-	-	-	-	-
16020939	87	JDSPS	Adult	Female	+	-	-	+	-	-	-
16020940	88	JDSPS	Adult	Female	++	-	-	-	-	-	-
16089791	89	JDSPS	Adult	Male	++	-	-	-	-	-	-
16089792	90	JDSPS	Adult	Male	++	+	-	-	-	-	-
16089793	91	JDSPS	Adult	Male	-	-	-	-	-	-	-
16089794	92	JDSPS	Adult	Male	++	-	-	-	-	-	-
16089795	93	JDSPS	Adult	Male	-	-	-	-	-	-	-
16089798	94	JDSPS	Adult	Male	+	+	-	-	-	-	-
16089800	95	JDSPS	Adult	Male	+	+	-	-	-	-	-
16089801	96	JDSPS	Adult	Male	-	-	-	-	-	-	-
16089803	97	JDSPS	Adult	Male	+	-	-	-	-	-	-
16089804	98	JDSPS	Adult	Male	+	+	-	-	-	-	-
16089805	99	JDSPS	Adult	Male	+ (larvae)	-	-	-	-	-	-
16089806	100	JDSPS	Adult	Male	+	+	-	-	-	-	-
16020934	101	JDSPS	Adult	Male	+++	+	-	-	-	-	-
16089790	102	JDSPS	Adult	Male	+	+	-	-	-	-	-
16089769	103	MD	Adult	Female	+++	-	-	-	-	-	-
16089771	104	MD	Adult	Female	++	+	-	-	-	-	-
16089774	105	MD	Adult	Female	++	+	-	-	-	-	-
16089776	106	MD	Adult	Female	++	++	-	-	-	-	-
16089778	107	MD	Adult	Female	+++	-	-	-	-	-	-
16089780	108	MD	Adult	Female	+ (larvae)	-	-	-	-	-	-
16089781	109	MD	Adult	Female	+++	+	-	-	-	-	-
16089786	110	MD	Adult	Female	++	+	-	-	-	-	-
16089787	111	MD	Adult	Female	++	-	-	-	-	-	-
16089789	112	MD	Adult	Female	++	+	-	-	-	-	-
16089768	113	MD	Adult	Male	-	++	-	-	-	-	-
16089770	114	MD	Adult	Male	++	-	-	-	-	-	-
16089772	115	MD	Adult	Male	++	+	+	-	-	-	-
16089775	116	MD	Adult	Male	-	-	-	-	-	-	-
16089777	117	MD	Adult	Male	+	+	-	-	-	-	-
16089779	118	MD	Adult	Male	+	-	-	-	-	-	-
16089785	119	MD	Adult	Male	-	-	-	-	-	-	-
16089783	120	MD	Adult		+	-	-	-	-	-	-
16089782	121	MD	Juveline		+++	-	-	-	-	-	-
16089773	122	MD	Sub Adult		+++	+	-	-	-	-	-
16089784	123	MD	Sub Adult		++	-	-	-	-	-	-
